# Supplementary material for: FraGAT: a fragment-oriented multi-scale graph attention model for molecular property prediction
Source: PubMed Central journal article supplement — Bioinformatics. 2021 Mar 26;37(18):2981–7. doi: 10.1093/bioinformatics/btab195 (PMC8479684; doi:10.1093/bioinformatics/btab195), 2021-03-26
Supplement: btab195_supplementary_data.pdf [file btab195_supplementary_data.pdf]

# Supplementary materials

## S1 Comparison with other fragmentation methods

FraGVAE and N-Gram Graph are existing fragment-based molecular property prediction models. Although these methods also break molecular graphs into fragments, these fragments are invalid in chemistry. Fig. S1 shows an example of breaking a molecule into fragments by FraGVAE and N-Gram Graph methods. It is obvious that the existing two fragment definitions will break an atomic group into small fragments that no longer represent a valid atomic group. Specifically, it will break the aromatic rings. And these small fragments cannot represent larger atomic groups or pharmacophores.

While our fragment definition is based on the common structure of atomic groups. It uses acyclic single bonds as breakable bonds, which can be considered as boundaries of atomic groups. As is shown in Fig. 1, the fragments generated by our method will always be valid in chemistry. And an atomic group will be preserved at least in one of the fragments. So, it makes it possible for the model to learn the latent relationship between functional groups and molecular properties.

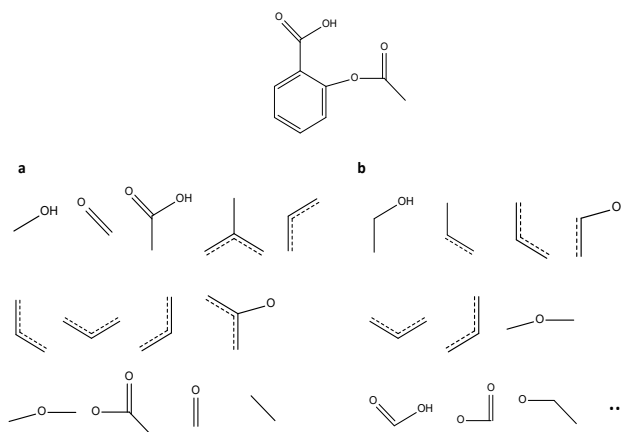

Figure S1: The fragments of aspirin extracted by (a) FraGVAE and (b) N-Gram Graph. Here for N-Gram Graph,  $n$  is set to be 3. Not all 3-gram fragments are listed.

## S2 Statistical information of datasets

Table S1 shows the statistical information of datasets that we used in this work. In this table,  $n$  denotes the number of molecules in the dataset,  $N_{mean}$  denotes the average number of atoms,  $N_b^{mean}$  denotes the average number of breakable bonds, and  $N_b^{max}$  denotes the maximum number of breakable bonds. Table S2 shows the distribution of positive/negative samples in datasets with classification tasks. In this table,  $n_{pos}$  and  $n_{neg}$  denotes the number of positive/negative samples, respectively.

Table S1: Statistical information of benchmark datasets.

| Category                 | Datasets | Tasks | $n$    | $N_{mean}$ | $N_b^{mean}$ | $N_b^{max}$ |
|--------------------------|----------|-------|--------|------------|--------------|-------------|
| Physio-chemical property | ESOL     | 1     | 1128   | 13.29      | 5.17         | 25          |
|                          | FreeSolv | 1     | 642    | 8.72       | 4.11         | 16          |
|                          | QM9      | 12    | 133247 | 8.80       | 2.76         | 8           |
|                          | Lipop    | 1     | 4200   | 27.04      | 8.80         | 51          |
|                          | CEP      | 1     | 29978  | 27.66      | 1.41         | 4           |
| Bioactivity              | HIV      | 1     | 41127  | 25.51      | 8.71         | 161         |
|                          | BACE     | 1     | 1513   | 34.09      | 13.74        | 62          |
|                          | SHP2     | 1     | 865    | 29.41      | 8.14         | 19          |
|                          | MUV      | 17    | 93087  | 24.23      | 7.69         | 23          |
|                          | Malaria  | 1     | 9999   | 30.36      | 10.33        | 87          |
| Physiology and Toxicity  | BBBP     | 1     | 2050   | 24.06      | 8.29         | 52          |
|                          | Tox21    | 12    | 7831   | 18.57      | 8.11         | 73          |
|                          | SIDER    | 27    | 1427   | 33.64      | 15.21        | 365         |
|                          | ClinTox  | 2     | 1484   | 26.16      | 10.67        | 87          |
|                          | ToxCast  | 617   | 8597   | 18.78      | 8.09         | 76          |

Table S2: Distribution of pos/neg samples of datasets with classification tasks.

| Dataset | Task          | Total number | $n_{pos}$ | $n_{pos}/n_{neg}$ |
|---------|---------------|--------------|-----------|-------------------|
| Tox21   | NR-AR         | 7265         | 309       | 0.044             |
|         | NR-AR-LBD     | 6758         | 237       | 0.036             |
|         | NR-AhR        | 6549         | 768       | 0.133             |
|         | NR-Aromatase  | 5821         | 300       | 0.054             |
|         | NR-ER         | 6193         | 793       | 0.147             |
|         | NR-ER-LBD     | 6955         | 350       | 0.053             |
|         | NR-PPAR-gamma | 6450         | 186       | 0.030             |
|         | SR-ARE        | 5832         | 942       | 0.193             |
|         | SR-ATAD5      | 7072         | 264       | 0.039             |
|         | SR-HSE        | 6467         | 372       | 0.061             |
|         | SR-MMP        | 5810         | 918       | 0.188             |
|         | SR-p53        | 6774         | 423       | 0.067             |
|         | ClinTox       | FDA_APPROVED | 1484      | 1390              |
| CT_TOX  |               | 1484         | 112       | 0.082             |
| SIDER   | SIDER1        | 1427         | 743       | 1.086             |
|         | SIDER2        | 1427         | 996       | 2.311             |
|         | SIDER3        | 1427         | 22        | 0.016             |
|         | SIDER4        | 1427         | 876       | 1.590             |
|         | SIDER5        | 1427         | 1151      | 4.170             |
|         | SIDER6        | 1427         | 997       | 2.319             |
|         | SIDER7        | 1427         | 1298      | 10.062            |
|         | SIDER8        | 1427         | 251       | 0.213             |
|         | SIDER9        | 1427         | 1024      | 2.541             |
|         | SIDER10       | 1427         | 727       | 1.039             |
|         | SIDER11       | 1427         | 376       | 0.358             |
|         | SIDER12       | 1427         | 1292      | 9.570             |
|         | SIDER13       | 1427         | 323       | 0.293             |
|         | SIDER14       | 1427         | 213       | 0.175             |
|         | SIDER15       | 1427         | 1108      | 3.473             |
|         | SIDER16       | 1427         | 885       | 1.633             |
|         | SIDER17       | 1427         | 1318      | 12.092            |
|         | SIDER18       | 1427         | 253       | 0.216             |
|         | SIDER19       | 1427         | 1006      | 2.390             |
|         | SIDER20       | 1427         | 1060      | 2.888             |
|         | SIDER21       | 1427         | 1016      | 2.472             |
|         | SIDER22       | 1427         | 911       | 1.766             |
|         | SIDER23       | 1427         | 125       | 0.960             |
|         | SIDER24       | 1427         | 659       | 0.858             |
|         | SIDER25       | 1427         | 988       | 2.251             |
|         | SIDER26       | 1427         | 1304      | 10.602            |
|         | SIDER27       | 1427         | 946       | 1.967             |
| HIV     | HIV           | 41127        | 1443      | 0.036             |
| BACE    | BACE          | 1513         | 691       | 0.841             |
| BBBP    | BBBP          | 2050         | 1567      | 3.244             |

### S3 Information and the patents of SHP2 dataset.

The patents that we used to construct the SHP2 dataset is listed in Table S3. Among the molecules proposed in these patents, only the molecules of which IC50 values are not larger than 10  $\mu M$  are considered to have good binding affinities and selected to build the SHP2 dataset.

Table S3: Information of the SHP2 dataset and the patents.

| Patent Number | selected number of molecules |
|---------------|------------------------------|
| WO2015107493  | 29                           |
| WO2015107494  | 50                           |
| WO2015107495  | 88                           |
| WO2016203404  | 83                           |
| WO2016203405  | 193                          |
| WO2016203406  | 120                          |
| WO2017211303  | 5                            |
| WO2017216706  | 66                           |
| WO2018013597  | 4                            |
| WO2018057884  | 41                           |
| WO2018081091  | 107                          |
| WO2018136265  | 5                            |
| WO2018172984  | 21                           |
| WO2019067843  | 25                           |
| WO2019075265  | 28                           |
| Total         | 865                          |

## S4 Results of the experiments on QM9 dataset.

Table S4 shows the performance of models on different tasks of QM9 benchmark. The top-2 models are bolded. Comparing the results of FraGAT and Attentive FP, it can be figured out that the FraGAT model can achieve better performance on 8 of 12 tasks. The experiments on QM9 dataset in N-Gram Graph are **not** conducted in multi-task learning way, but training models seperately for each task. So that the performances of the N-Gram Graph model is relatively better on some tasks. However, the FraGAT model can still achieve better performance on 7 of 12 tasks. Values of Attentive FP and baselines are cited from (Xiong *et al.*, 2019)

Table S4: The performance on different tasks of QM9 benchmark.

| Task  | DTNN         | GC      | MPNN    | Attentive FP   | N-Gram XGB   | FraGAT         |
|-------|--------------|---------|---------|----------------|--------------|----------------|
| mu    | <b>0.244</b> | 0.583   | 0.358   | <b>0.451</b>   | 0.535        | 0.479          |
| alpha | 0.95         | 1.37    | 0.89    | <b>0.492</b>   | 0.612        | <b>0.446</b>   |
| homo  | 0.00388      | 0.00716 | 0.00541 | <b>0.00358</b> | 0.005        | <b>0.00356</b> |
| lumo  | 0.00513      | 0.00921 | 0.00623 | <b>0.00415</b> | 0.005        | <b>0.00435</b> |
| gap   | 0.0066       | 0.0112  | 0.0082  | <b>0.00528</b> | 0.007        | <b>0.00538</b> |
| r2    | <b>17</b>    | 35.9    | 28.5    | <b>26.839</b>  | 59.137       | 28.576         |
| zpve  | 0.00172      | 0.00299 | 0.00216 | 0.00120        | <b>0.000</b> | <b>0.00107</b> |
| u0    | 2.43         | 3.41    | 2.05    | 0.898          | <b>0.427</b> | <b>0.658</b>   |
| u298  | 2.43         | 3.41    | 2       | 0.893          | <b>0.428</b> | <b>0.658</b>   |
| h298  | 2.43         | 3.41    | 2.02    | 0.893          | <b>0.428</b> | <b>0.658</b>   |
| g298  | 2.43         | 3.41    | 2.02    | 0.893          | <b>0.428</b> | <b>0.658</b>   |
| Cv    | 0.27         | 0.65    | 0.42    | <b>0.252</b>   | 0.334        | <b>0.216</b>   |

## S5 Influence of our data-augmentation method to the performance

During the evaluation step, the data-augmentation method is used for dealing with the additional randomness. To quantitatively measure this randomness and the influence of our data-augmentation method to the performance of the model, we conduct a supplementary experiment. In this experiment, we test well-trained models on four datasets: ESOL, SHP2, ClinTox, SIDER. A fixed test set is used for evaluation. During the evaluation step, we no longer input all of the  $N_b$  samples, but input  $\alpha * N_b$  samples, where  $\alpha$  is a parameter to adjust the batch size of the augmented samples. Here 5 values of  $\alpha$  are selected. And for each value, the evaluation is repeated for 50 times on the fixed test set.

The result of this experiment is shown in Fig. S2 and Table S5. The statistical information of  $N_b$  of the test sets of these four datasets is shown in Table S6. From Fig.S2 and Table S5, we can see that as the increase of  $\alpha$ , the performance fluctuation decreases, which means the model is more stable. This indicates that by using the data-augmentation strategy, the performance uncertainty can be restrained. The slightly improved average index indicates that there might be some samples that the model cannot predict accurately. While using data-augmentation strategy, the influence of these difficult samples will be reduced. So that the average performance of the model can achieve a better level.

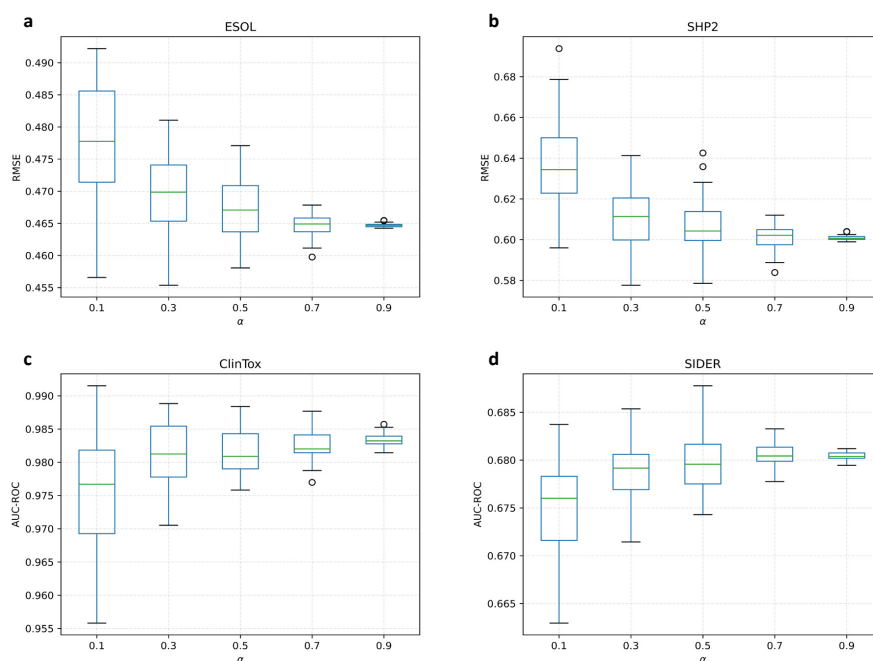

Figure S2: The result of the randomness experiments.

Table S5: The detailed result of the randomness experiments.

| Dataset | $\alpha$ | $P_{mean}$ | $P_{variance}$ |
|---------|----------|------------|----------------|
| ESOL    | 0.1      | 0.4780     | 0.0090         |
|         | 0.3      | 0.4697     | 0.0061         |
|         | 0.5      | 0.4674     | 0.0049         |
|         | 0.7      | 0.4647     | 0.0018         |
|         | 0.9      | 0.4647     | 0.0003         |
| SHP2    | 0.1      | 0.6369     | 0.0203         |
|         | 0.3      | 0.6101     | 0.0146         |
|         | 0.5      | 0.6063     | 0.0139         |
|         | 0.7      | 0.6008     | 0.0064         |
|         | 0.9      | 0.6009     | 0.0011         |
| ClinTox | 0.1      | 0.9756     | 0.0081         |
|         | 0.3      | 0.9810     | 0.0049         |
|         | 0.5      | 0.9814     | 0.0031         |
|         | 0.7      | 0.9825     | 0.0023         |
|         | 0.9      | 0.9834     | 0.0009         |
| SIDER   | 0.1      | 0.6748     | 0.0047         |
|         | 0.3      | 0.6789     | 0.0029         |
|         | 0.5      | 0.6796     | 0.0028         |
|         | 0.7      | 0.6806     | 0.0012         |
|         | 0.9      | 0.6805     | 0.0004         |

Table S6: Distribution of  $N_b$  of the test sets.

| Dataset | $N_b^{mean}$ | $N_b^{max}$ |
|---------|--------------|-------------|
| ESOL    | 5.36         | 20          |
| SHP2    | 8.48         | 14          |
| ClinTox | 10.53        | 52          |
| SIDER   | 11.39        | 70          |

## S6 Number of learnable parameters of ablation models

The number of learnable parameters of M12 and FraGAT models are listed in Table S7. Those models that can achieve the best performance on each dataset are selected.

In fact, the numbers of learnable parameters of M12 and FraGAT are largely influenced by the length of the latent vector,  $F$ , and the structure of the classifier. These hyperparameters are determined automatically and they may be different in M12 and FraGAT. And the complexity of FraGAT is not always larger than that of M12. For example, for the M12 model trained on ESOL dataset,  $F=32$  and the numbers of cells of each layer of the classifier are  $[32*3, 1]$ . While for the FraGAT model on ESOL,  $F=150$  and the numbers of cells are  $[150*4, 512, 1]$ . So the total number of parameters of FraGAT on ESOL is about 55 times of that of M12. However, the situation is different on BBBP dataset. For M12,  $F=200$  and the numbers of cells for each layer are  $[200*3, 128, 32, 2]$ . While for FraGAT,  $F=32$  and the numbers are  $[32*4, 512, 2]$ . In this case, the total number of parameters of the M12 is almost 10 times of that of the FraGAT model.

Except for those special cases, compared with M12, FraGAT generally has more learnable parameters. As is shown in Table S7, the total number of parameters of M12 is about 0.6 to 0.8 times of that of the FraGAT model.

Table S7: The number of learnable parameters.

| benchmark | M12     | FraGAT  | M12 / FraGAT |
|-----------|---------|---------|--------------|
| ESOL      | 30954   | 1729046 | 0.018        |
| FreeSolv  | 1400705 | 1777656 | 0.788        |
| HIV       | 504715  | 871569  | 0.579        |
| BACE      | 1400738 | 2435003 | 0.575        |
| BBBP      | 1181131 | 121041  | 9.758        |
| Tox21     | 33185   | 57063   | 0.582        |
| SIDER     | 36095   | 60933   | 0.592        |
| ClinTox   | 31245   | 54483   | 0.573        |



## S7 Influence of parameters of graph model to the performance

In this part, the influence of the parameters of graph model to the performance of FraGAT is tested. In our experiments, four datasets, ClinTox, BACE, ESOL and FreeSolv, are used. For each dataset, three parameters of the graph model, layers of Attentive FP for atom embeddings (denoted as  $k$ ), layers of Attentive FP for molecule embeddings (denoted as  $T$ ), and the length of the latent vector (denoted as  $F$ ), are changed during the experiments. And the other parameters are set to be the same as those used in the benchmark experiments and remain unchanged. The model is trained and evaluated for 5 times for each parameter combination, and the mean of the metrics on the test set is reported. The results are shown in Fig. S3.

From Fig. S3, although we can see that the model will achieve an optimal performance on some specific parameter combination, the relationship of these parameters to the performance of the model is not obvious from these results. It is known that the number of layers of the graph model determines the distance that the information propagates in the graph. Thus, there must be some association among the radius of the graph, the number of the layers and the performance of the model. However, in our experiments, the radius of the molecular graphs and the fragments are diverse. So that the most appropriate number of layers for each graph might be different. Thus, it is not easy to find the concrete relationship between the parameter of the graph model and prediction performance. We intend to leave this issue for a future work.

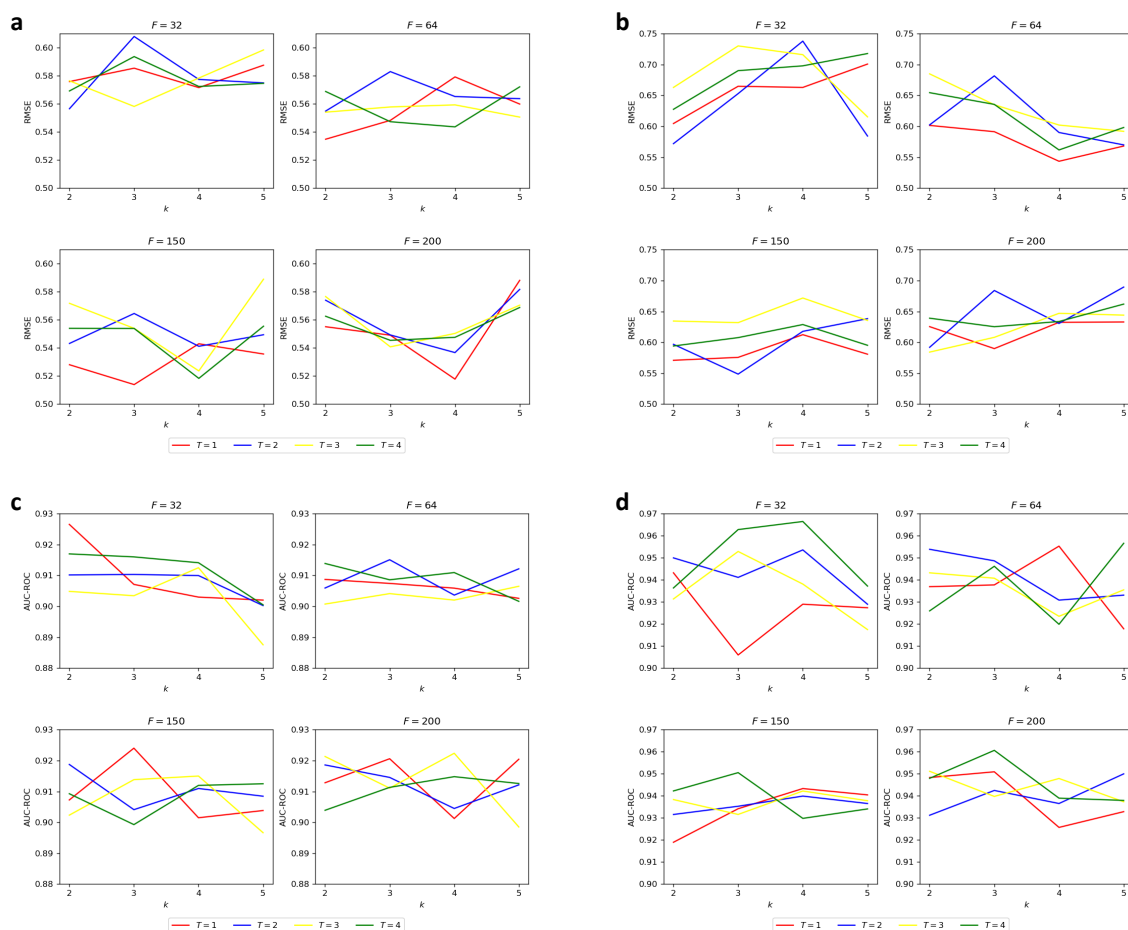

Figure S3: Influence of parameters of graph model to the performance. (a) ESOL (b) FreeSolv (c) BACE (d) ClinTox.

## S8 Detailed results of case studies

Table S8 shows the detailed result of the interpretability experiment. The upper, middle and lower part of the table are the response of the model toward different samples of molecule  $a$ ,  $b$  and  $c$ , respectively.

Table S8: Responses of the model toward different samples of three molecules.

| bond number | $y_i$  | $l$   | absolute error | error ranking |
|-------------|--------|-------|----------------|---------------|
| 0           | 0.159  | 0.064 | 0.095          | 5             |
| 1           | 0.040  | 0.064 | 0.025          | 4             |
| 2           | 0.056  | 0.064 | 0.009          | 2             |
| 3           | 0.043  | 0.064 | 0.021          | 3             |
| 4           | 0.302  | 0.064 | 0.238          | 6             |
| 5           | 0.058  | 0.064 | 0.006          | 1             |
| 0           | 0.409  | 0.024 | 0.385          | 11            |
| 1           | 0.039  | 0.024 | 0.015          | 1             |
| 2           | -0.128 | 0.024 | 0.152          | 9             |
| 3           | -0.039 | 0.024 | 0.063          | 3             |
| 4           | -0.065 | 0.024 | 0.089          | 4             |
| 5           | -0.065 | 0.024 | 0.089          | 4             |
| 6           | -0.065 | 0.024 | 0.089          | 4             |
| 7           | -0.079 | 0.024 | 0.103          | 7             |
| 8           | 0.330  | 0.024 | 0.306          | 10            |
| 9           | -0.026 | 0.024 | 0.050          | 2             |
| 10          | -0.080 | 0.024 | 0.104          | 8             |
| 0           | 0.163  | 0.003 | 0.160          | 8             |
| 1           | 0.006  | 0.003 | 0.003          | 1             |
| 2           | 0.150  | 0.003 | 0.147          | 7             |
| 3           | 0.043  | 0.003 | 0.040          | 5             |
| 4           | -0.050 | 0.003 | 0.053          | 6             |
| 5           | -0.009 | 0.003 | 0.012          | 2             |
| 6           | -0.011 | 0.003 | 0.014          | 3             |
| 7           | -0.011 | 0.003 | 0.014          | 4             |

## S9 SHP099

SHP099 (Fortanet *et al.*, 2016) is a template molecule for studying drugs of target SHP2 in recent years. Researchers study to find molecules with better binding affinity by modify the structure of SHP099. The binding affinity of SHP099 is  $0.07 \mu M$ , and its structure, which is shown in Fig. S4, consists of 3 parts: aryl, central ring and heterocycle.

According to the X-ray cocrystal analysis in (Fortanet *et al.*, 2016), the binding affinity is mainly contributed by two interactions: the PHE-113 interaction with the amino-group on the heterocycle and cationic- $\pi$  stacking interaction between the aryl, central ring and ARG-111. In (Fortanet *et al.*, 2016), it is shown that the amino-group on the heterocycle will form ionic bonds with the SHP2 protein. And the bond energy of the ionic bond is so larger that this amino-group contributes major binding affinity to the molecule. For the interaction between SHP099 and ARG-111, it is revealed by (Fortanet *et al.*, 2016) that the ortho-chlorine on the Aryl effectively fill a hydrophobic pocket on the SHP2 protein, which is beneficial to binding. Besides, the amino-group on the central ring also form a hydrogen bond with GLU-250.

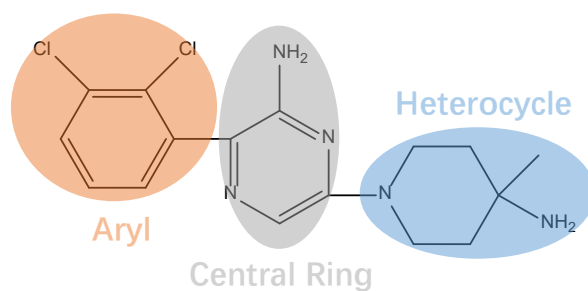

Figure S4: The structure of molecule SHP099.

## S10 Molecular Docking Result

Fig. S5 shows the molecular docking result of molecule *c* in Sec. 3.3. Just like the discussion of SHP099 in Sec. S9, similar interactions are revealed in this figure, including the interaction between aryl, central ring and ARG-111, the interaction between amino-group on spirocycle and PHE-113 and the H-bond between amino-group on the central ring and GLU-250. Besides, the hydroxy on the spirocycle can form an extra hydrogen bond with GLU-249, which further increase the binding affinity.

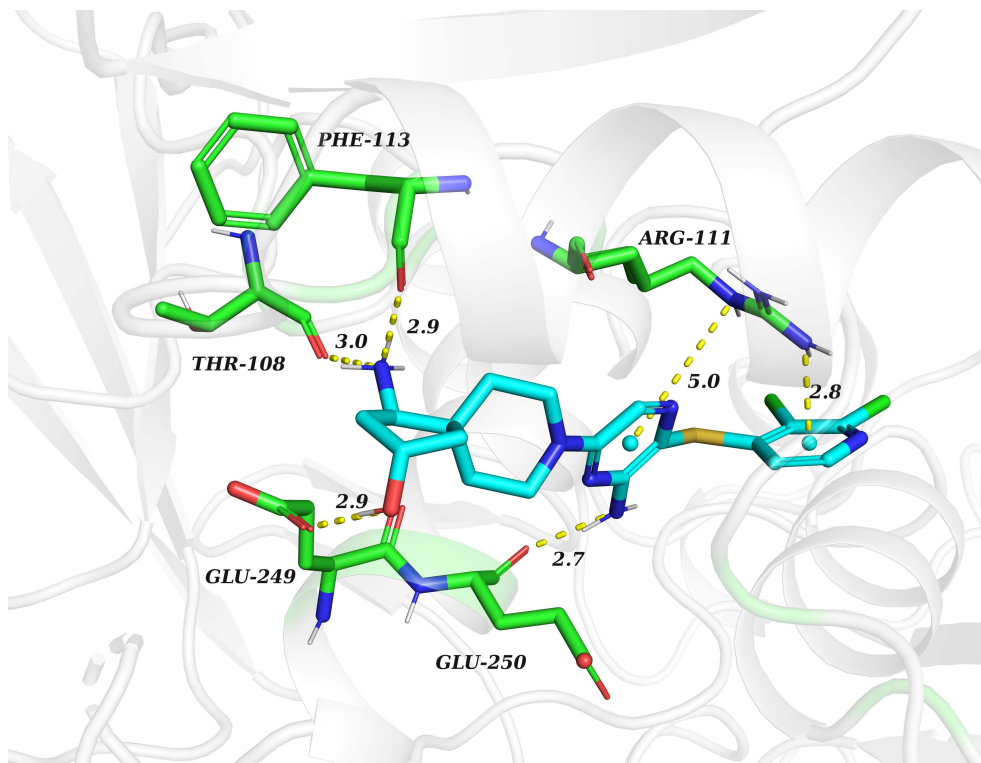

Figure S5: The docking result of molecule *c*.
